# Supplementary material for: Nasal High‐flow Oxygen Versus Conventional Oxygen Therapy for Acute Severe Asthma Patients: A Pilot Randomized Controlled Trial
Source: PubMed Central journal article supplement — Acad Emerg Med. 2020 Dec 22;28(5):530–41. doi: 10.1111/acem.14187 (PMC8247327; doi:10.1111/acem.14187), 2020-12-22
Supplement: ACEM-28-530-s001.pdf [file ACEM-28-530-s001.pdf]

## Data Supplement S1 . Supplemental material

TABLE S1 Secondary outcomes of per-protocol analysis

|                                                             | At 30 minutes |                                              | At 60 minutes |                                              | At 120 minutes |                                              |
|-------------------------------------------------------------|---------------|----------------------------------------------|---------------|----------------------------------------------|----------------|----------------------------------------------|
|                                                             | COT (n=17)    | NHF (n=18)<br>Difference (95%CI);<br>p-value | COT (n=17)    | NHF (n=18)<br>Difference (95%CI);<br>p-value | COT (n=17)     | NHF (n=18)<br>Difference (95%CI);<br>p-value |
| <b>Patient-reported outcomes</b>                            |               |                                              |               |                                              |                |                                              |
| MBS                                                         | 5.7 ± 2.1     | 4.9 ± 1.8<br>0.7 (-0.9, 2.3); p=0.80         | 3.9 ± 2.5     | 2.4 ± 1.4<br>1.5 (-0.1, 3.1); p=0.08         | 2.9 ± 1.9      | 0.9 ± 1.4<br>2.0 (0.4, 3.6); p=0.006         |
| NRS                                                         | 5.6 ± 2.2     | 4.8 ± 1.7<br>0.9 (-0.7, 2.5); p=0.59         | 3.8 ± 2.5     | 2.3 ± 1.5<br>1.6 (0.02, 3.2); p=0.046        | 2.8 ± 1.9      | 0.9 ± 1.4<br>2.0 (0.4, 3.6); p=0.008         |
| <b>Physician-reported outcome and physiologic variables</b> |               |                                              |               |                                              |                |                                              |
| Dyspnea score                                               | 3.5 ± 2.0     | 2.9 ± 1.5<br>0.6 (-1.1, 2.3); p=0.91         | 2.8 ± 2.0     | 1.4 ± 1.4<br>1.4 (0.01, 2.8); p=0.048        | 2.7 ± 1.8      | 0.9 ± 1.4<br>1.9 (0.3, 3.8); p=0.02          |
| Respiratory rate                                            | 28.0 ± 5.4    | 24.9 ± 2.7<br>2.1 (-1.0, 5.3); p=0.37        | 26.4 ± 4.2    | 22.3 ± 2.4<br>4.1 (0.4, 7.8); p=0.02         | 25.4 ± 4.2     | 19.9 ± 2.8<br>4.6 (1.4, 7.8); p=0.001        |
| Pulse oximetry                                              | 96.4 ± 2.5    | 97.7 ± 2.1<br>-1.3 (-3.4, -0.8); p=0.45      | 97.1 ± 2.5    | 98.0 ± 1.9<br>-0.9 (-3.0, 1.2); p=0.82       | 97.2 ± 2.6     | 98.5 ± 1.3<br>-1.3 (-3.4, 0.8); p=0.49       |
| Heart rate                                                  | 107.2 ± 16.0  | 104.3 ± 19.7<br>4.1 (-7.3, 15.4); p=0.90     | 105.2 ± 14.0  | 101.4 ± 18.7<br>4.8 (-6.5, 16.2); p=0.81     | 100.7 ± 11.6   | 100.1 ± 18.9<br>1.7 (-9.7, 13.1); p=0.34     |
| Mean arterial pressure                                      | 93.7 ± 11.5   | 98.4 ± 15.8<br>-4.1 (-13.8, 5.7); p=0.83     | 90.8 ± 11.4   | 92.4 ± 13.0<br>-0.9 (-10.7, 8.8); p=0.99     | 86.6 ± 9.7     | 96.7 ± 16.9<br>-9.3 (-19.1, 0.4); p=0.07     |

Data are presented as mean ± SD or median (IQR). COT; conventional oxygen therapy, NHF; nasal high flow  
Covariance structure of first order autoregressive was the most parsimonious for most outcomes except heterogeneous autoregressive for the dyspnea scale

**TABLE S2** Sensitivity analysis of arterial blood gas results

|                                | Before intervention |              |                                                  | After intervention (at 120 minutes) |               |                                                  | Within-group difference <sup>c</sup> (95%CI); <i>p</i> -value |                                     |  |
|--------------------------------|---------------------|--------------|--------------------------------------------------|-------------------------------------|---------------|--------------------------------------------------|---------------------------------------------------------------|-------------------------------------|--|
|                                | COT (n=10)          | NHF (n=17)   | Difference <sup>a</sup> (95%CI); <i>p</i> -value | COT (n=10)                          | NHF (n=17)    | Difference <sup>b</sup> (95%CI); <i>p</i> -value | COT (n=10)                                                    | NHF (n=17)                          |  |
| <b>pH</b>                      | 7.41 ± 0.06         | 7.37 ± 0.04  | 0.03 (-0.01, 0.07); <i>p</i> =0.11               | 7.40 ± 0.03                         | 7.37 ± 0.05   | 0.03 (-0.002, 0.07); <i>p</i> =0.07              | 0.003 (-0.02, 0.03); <i>p</i> =0.81                           | 0.003 (-0.02, 0.03); <i>p</i> =0.76 |  |
| <b>pH<sub>adj</sub></b>        |                     |              |                                                  | 7.39 (0.01)                         | 7.38 (0.01)   | 0.02 (-0.02, 0.05); <i>p</i> =0.28               |                                                               |                                     |  |
| <b>PaCO<sub>2</sub></b>        | 32.9 ± 8.4          | 38.5 ± 6.9   | -5.7 (-11.8, 0.5); <i>p</i> =0.07                | 32.3 ± 7.0                          | 37.2 ± 8.4    | -4.9 (-11.4, 1.7); <i>p</i> =0.14                | 0.6 (-2.2, 3.3); <i>p</i> =0.65                               | 1.4 (-0.7, 3.4); <i>p</i> =0.18     |  |
| <b>PaCO<sub>2adj</sub></b>     |                     |              |                                                  | 35.6 (1.3)                          | 35.2 (1.0)    | 0.4 (-3.1, 3.9); <i>p</i> =0.82                  |                                                               |                                     |  |
| <b>PaO<sub>2</sub></b>         | 165.9 ± 68.3        | 136.0 ± 49.1 | 29.9 (-16.7, 76.5); <i>p</i> =0.20               | 141.2 ± 51.1                        | 120.2 ± 37.9  | 21.0 (-14.4, 56.4); <i>p</i> =0.23               | 24.7 (-13.5, 62.9); <i>p</i> =0.18                            | 15.8 (-6.4, 38.0); <i>p</i> =0.15   |  |
| <b>PaO<sub>2adj</sub></b>      |                     |              |                                                  | 132.9 (11.5)                        | 125.1 (8.8)   | 7.7 (-22.7, 38.1); <i>p</i> =0.61                |                                                               |                                     |  |
| <b>P/F ratio</b>               | 338.3 ± 68.5        | 278.4 ± 54.7 | 59.9 (10.6, 109.2); <i>p</i> =0.02               | 340.7 ± 170.5                       | 316.4 ± 104.1 | 24.3 (-104.3, 152.9); <i>p</i> =0.69             | -2.4 (-110.3, 105.5); <i>p</i> =0.96                          | -38.0 (-96.8, 20.8); <i>p</i> =0.19 |  |
| <b>P/F ratio<sub>adj</sub></b> |                     |              |                                                  | 317.4 (44.0)                        | 330.1 (32.8)  | -12.7 (-131.6, 106.2); <i>p</i> =0.83            |                                                               |                                     |  |
| <b>HCO<sub>3</sub></b>         | 23.1 ± 4.0          | 24.3 ± 6.2   | -1.2 (-5.7, 3.3); <i>p</i> =0.60                 | 22.2 ± 4.1                          | 21.8 ± 4.3    | 0.3 (-3.3, 3.6); <i>p</i> =0.91                  | 0.9 (-0.2, 2.1); <i>p</i> =0.10                               | 2.5 (-0.8, 5.7); <i>p</i> =0.13     |  |
| <b>HCO<sub>3adj</sub></b>      |                     |              |                                                  | 22.4 (1.2)                          | 21.7 (0.9)    | 0.8 (-2.4, 4.0); <i>p</i> =0.63                  |                                                               |                                     |  |

Data are presented as mean± SD or adjusted mean (SE). COT; conventional oxygen therapy, NHF; nasal high flow, PaCO<sub>2</sub>; arterial partial pressure of carbon dioxide, PaO<sub>2</sub>; arterial partial pressure of oxygen, P/F; PaO<sub>2</sub>/fraction of inspired oxygen, HCO<sub>3</sub>; bicarbonate.

<sup>a</sup>independent sample t-test, <sup>b</sup>analysis of covariance adjusted for baseline values of that outcome variable, <sup>c</sup>before-after paired-sample t-test
